# Supplementary material
Source: Springer Nature journal article supplement (https://www.springermedizin.de/resource/supplementary/13221_2011_19_MOESM1_ESM.pdf/9680778)

**CD90**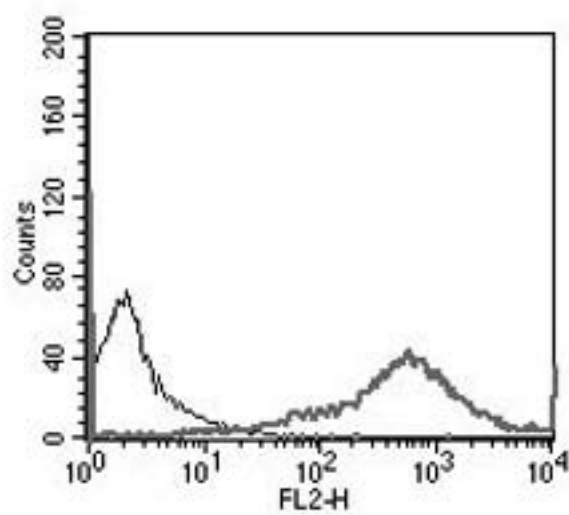**CD31**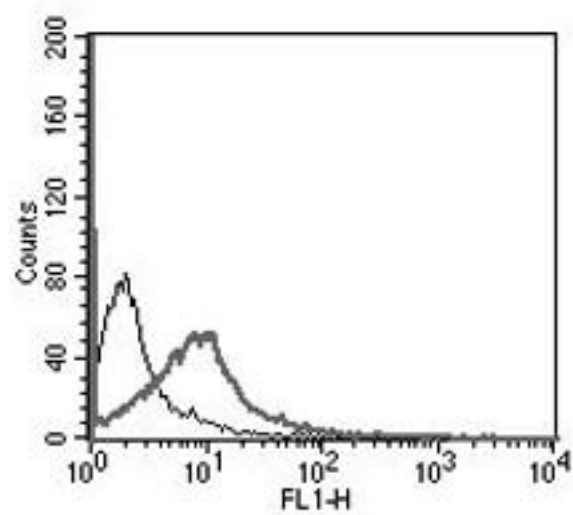**HemSC**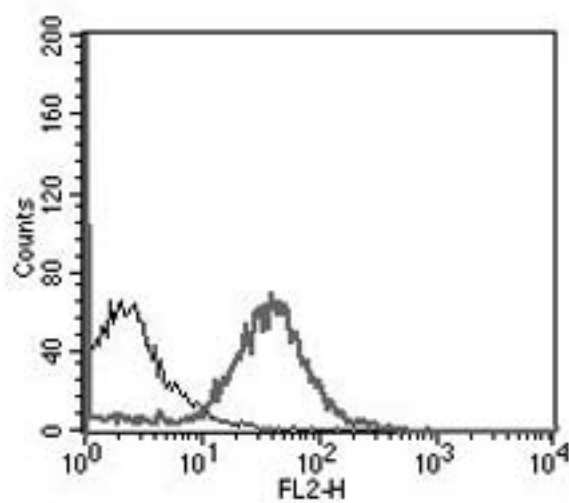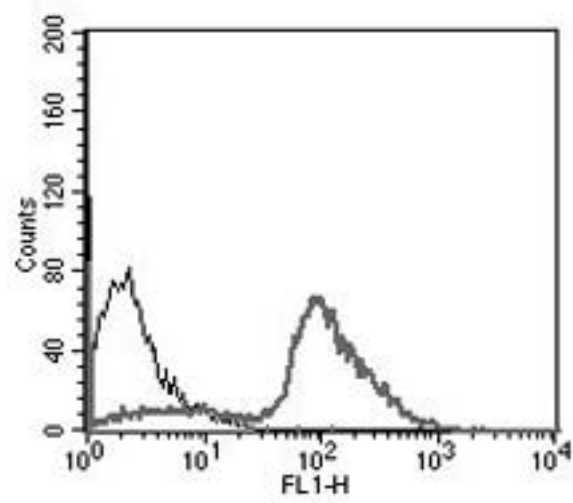**HemEC****Notch3**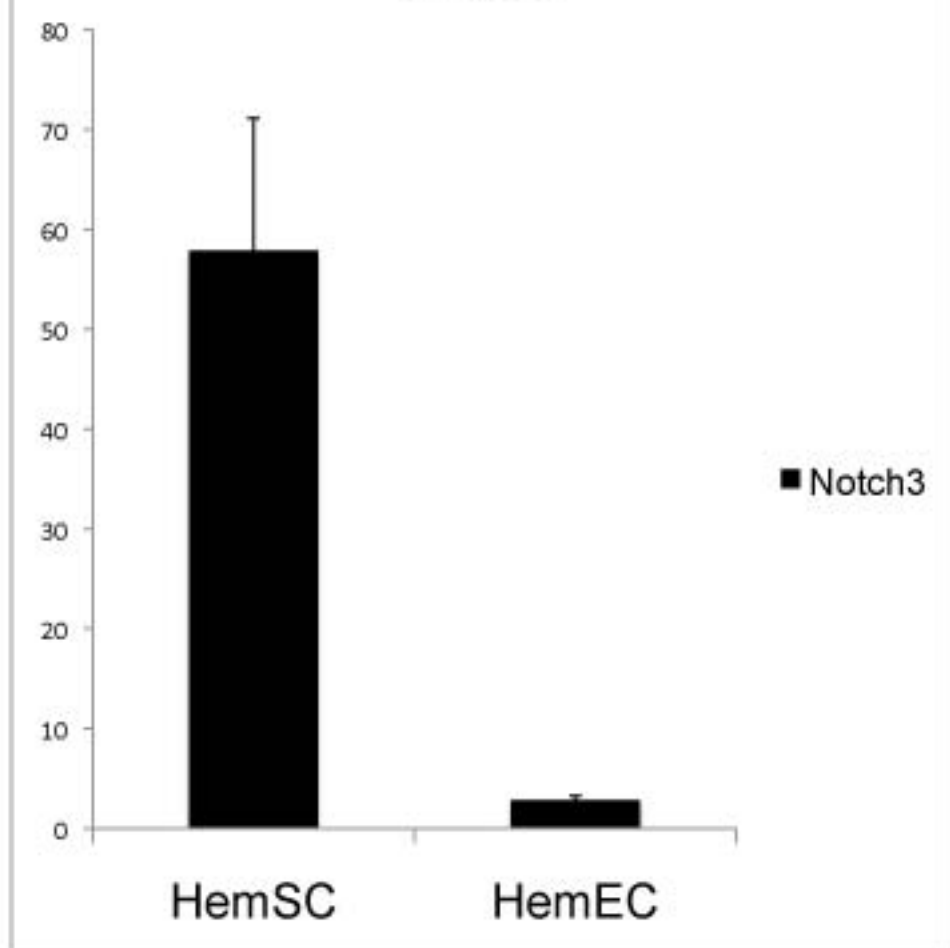

Supplement: MOESM1 [file 9680778]
